# Supplementary material for: Deep learning MRI model using perifocal edema to differentiate brain metastasis from central nervous system infection
Source: Research Square preprint supplement (doi:10.21203/rs.3.rs-7215828/v1), 2025-10-29
Supplement: Supplementary file 1 [file dbbdb4688e51b964b5e17d1a.docx]

**Supplemental Materials**

**Title: Deep learning MRI model using perifocal edema to differentiate brain** **metastasis from central nervous system infection**

**Supplemental Table I. MR scan protocols**

| Scanner | Sequence | TR（ms） | TE（ms） | FOV（cm） | Slice thickness（mm） | Slice gap （mm） |
| --- | --- | --- | --- | --- | --- | --- |
| Philips Achieva 1.5 T | T2WI | 4339 | 120 | 23 | 6 | 1 |
| T1WI | 488 | 15 | 23 | 6 | 1 |
| DWI | 2003 | 70.7 | 23 | 6 | 1 |
| FLAIR | 5000 | 120 | 23 | 6 | 1 |
|  | T1C | 488 | 15 | 23 | 6 | 1 |
| Philips Achieva 3.0 T | T2WI | 3000 | 80 | 23 | 6 | 1 |
| T1WI | 2000 | 10 | 23 | 6 | 1 |
| DWI | 3000 | 106 | 23 | 6 | 1 |
| FLAIR | 6000 | 140 | 23 | 6 | 1 |
| T1C | 194 | 4.6 | 23 | 6 | 1 |
| Siemens Verio 3.0 T | T2WI | 4000 | 93 | 23 | 6 | 1 |
| T1WI | 1900 | 8.5 | 23 | 6 | 1 |
| DWI | 4500 | 100 | 23 | 6 | 1 |
| FLAIR | 6600 | 94 | 23 | 6 | 1 |
| T1C | 250 | 2.5 | 23 | 6 | 1 |
| GE signa HDxt 1.5T | T2WI | 3460 | 109 | 24 | 5 | 1 |
| T1WI | 1900 | 8.5 | 24 | 5 | 1 |
| DWI | 4600 | 82 | 24 | 5 | 1 |
| FLAIR | 6000 | 134 | 24 | 5 | 1 |
| T1C | 1966 | 8.7 | 24 | 5 | 1 |
| GE signa HDX 3.0T | T2WI | 3160 | 104.8 | 24 | 5 | 1 |
| T1WI | 2761 | 8.7 | 24 | 5 | 1 |
| DWI | 5100 | 74 | 24 | 5 | 1 |
| FLAIR | 8000 | 150 | 24 | 5 | 1 |
| T1C | 1792 | 14.4 | 24 | 5 | 1 |
| Siemens Skyra 3.0T | T2WI | 3400 | 109 | 24 | 5 | 1 |
| T1WI | 1900 | 8.5 | 24 | 5 | 1 |
| DWI | 3200 | 73 | 24 | 5 | 1 |
| FLAIR | 8000 | 80 | 24 | 5 | 1 |
| T1C | 2000 | 8.5 | 24 | 5 | 1 |

TR, repetition time; TE, echo time; FOV, field of view; T2WI, T2-weighted imaging; DWI, diffusion-weighted imaging; CE-T1WI, contrast-enhanced T1-weighted imaging

**Supplemental Table Ⅱ**  The clinical characteristics of patients

|  | Medical institution A | | |  | Medical institution B | | |
| --- | --- | --- | --- | --- | --- | --- | --- |
| BM | CNSI | *P* |  | BM | CNSI | *P* |
| Case | 130 | 84 |  |  | 32 | 28 |  |
| Sex |  |  |  |  |  |  |  |
| Male | 71（54.6%） | 54（64.3%） | 0.161 |  | 25（78.1%） | 24（85.7%） | 0.301 |
| Female | 59（45.4%） | 30（35.7%） |  |  | 7（21.9%） | 4（14.3%） |  |
| Age | 56.05±11.60 | 47.86±17.96 | **＜0.001** |  | 62.09±8.83 | 54.75±13.51 | **0.015** |
